# Supplementary material for: Irreversible glacier change and trough water for centuries after overshooting 1.5°C
Source: Research Square preprint supplement (doi:10.21203/rs.3.rs-5045894/v1), 2024-09-25
Supplement: Supplementary file 1 [file 5778956152a8312059eac42a.pdf]

1 Supplementary information for the manuscript:

2 **“Irreversible glacier change and trough water for centuries**  
3 **after overshooting 1.5°C”**

4 LILIAN SCHUSTER, FABIEN MAUSSION, DAVID R. ROUNCE, LIZZ ULTEE, PATRICK SCHMITT, FABRICE  
5 LACROIX, THOMAS L. FRÖLICHER, AND CARL-FRIEDRICH SCHLEUSSNER

6 *Correspondence to Lilian Schuster (lilian.schuster@uibk.ac.at)*

7 *and Fabien Maussion (fabien.maussion@bristol.ac.uk)*

8 **Contents**

9 **Supplementary Methods on additional experiments and scenarios** **2**

10 **Supplementary Figures, Results, and Discussion** **3**

11 Comparison to other glacier mass projections under global temperature overshoots . . . . . 4

12 Additional idealised experiments . . . . . 5

13 Glacier mass projections under GFDL-ESM2M extended scenarios . . . . . 9

14 Additional global and regional glacier mass projections under GFDL-ESM2M . . . . . 10

15 Additional glacier runoff projections under GFDL-ESM2M . . . . . 11

16 Additional analysis on local or regional climate of W5E5 or GFDL-ESM2M . . . . . 17

## 17 **Supplementary Methods on additional experiments and scenarios**

18 To compare the GFDL-ESM2M stabilisation and overshoot scenarios, we looked at other existing climate  
19 model projections with temperature overshoots beyond 2100. We found that for the CMIP6 projections  
20 until the year 2300, there are seven Shared Socioeconomic Pathways (from SSP1-2.6 and SSP5-3.4-over)  
21 and climate model combinations with a considerable temporal temperature overshoot ( $>0.6^{\circ}\text{C}$ , Supple-  
22 mentary Fig. 1). Regional and global mass change simulations are available for these climate projections  
23 from three glacier models (dataset of ref.<sup>1</sup>) The available glacier simulations come from the glacier model  
24 OGGM (same version as for the GFDL-ESM2M projections, i.e., OGGM v1.6.1, but with bias correction  
25 from the period 2000–2019; original model ref.<sup>2</sup>), PyGEM-OGGM (similar version as in<sup>3</sup>), and Glo-  
26 GEM (version as in<sup>4</sup>; original model ref.<sup>5</sup>). In Supplementary Fig. 1, we qualitatively compared these  
27 temperature overshoots and glacier projections.

28 Supplementary Fig. 2 extends the ‘Idealised experiments’ shown in the main text to the largest glaciers  
29 from six glacier regions. For every glacier, a temperature bias  $t_{ss}$  on top of the 1999–2019 climate was  
30 found where the glacier, after many centuries, reaches a steady state with a mass similar to the glacier  
31 mass at inventory date (around 2000). From this state, for every glacier, the temperature changes of  
32 Supplementary Fig. 2a are applied, which results in different responses of glacier mass and runoff. The  
33 starting and ending temperatures are the same for the stabilisation and overshoot experiments, and the  
34 glaciers are in or reach steady state, respectively. In addition to the ‘Idealised experiments’ described in  
35 the main methods, simulations were performed increasing or decreasing precipitation linearly in relation  
36 to the temperature changes to assess the influence of precipitation changes on these idealised experiments  
37 ( $\pm 5\% \text{ }^{\circ}\text{C}^{-1}$ ; Supplementary Fig. 3).

38 Further simulations of glacier evolution post-2500 were done by using the glacier states from 2500 of  
39 the  $1.5^{\circ}\text{C}$  Stabilisation and  $3.0 \rightarrow 1.5^{\circ}\text{C}$  Overshoot scenarios, and repeatedly exposing them to the 2399–  
40 2499 climate from the  $1.5^{\circ}\text{C}$  Stabilisation scenario over in total 10,000 years (more in Supplementary  
41 Fig. 4). Results for these extended stabilisation and overshoot simulations are shown for 96% of the total  
42 glacier area. The additional missing glacier area comes specifically from RGI regions 03, 07, 09, 10 and  
43 19, where 5–20% of the glaciers (by area) fail (i.e., the glacier area exceeds the domain boundary after  
44 year 2500).

45 We also forced OGGM with four additional GFDL-ESM2M scenarios that are not shown in the main  
46 manuscript figures; two additional global temperature stabilisation scenarios ( $2.0^{\circ}\text{C}$ ,  $2.5^{\circ}\text{C}$  warming above

47 pre-industrial ESM levels) and two temporal temperature overshoot scenarios that peak at 2.0°C and 2.5°C  
48 and then decline back to 1.5°C<sup>6</sup>. For clarity, our figures do not show the 2.0°C and 2.5°C Stabilisation  
49 scenarios, but the data is available (see 'Data and Code availability' statement). The 2.5→1.5°C Overshoot  
50 and 2.5→1.5°C Overshoot scenarios are only shown in Supplementary Fig. 5. In the overshoot scenarios,  
51 temperature peaks at 2.0°C in year 2088 and at 2.5°C in year 2147. These temporary overshoot simulations  
52 converge back to 1.5°C stabilisation levels in years 2270 and 2363, respectively.

54 **Comparison to other glacier mass projections under global temperature overshoots**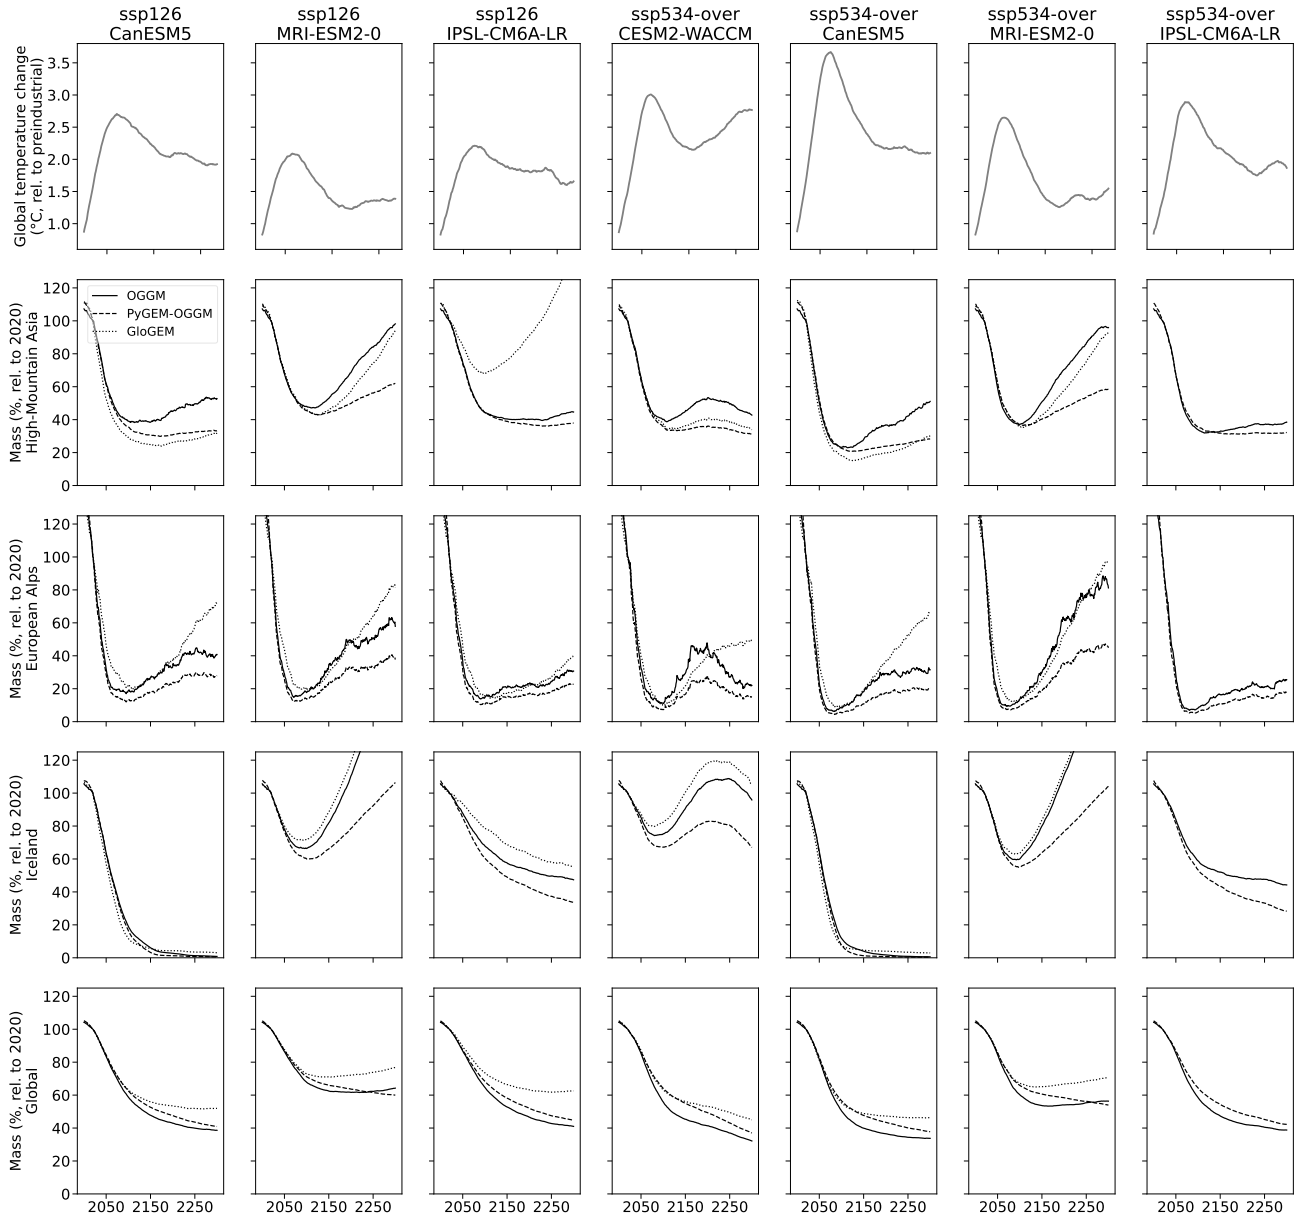

**Figure 1: Global mean temperature change (31-year averaged) and regional and global glacier mass projections until year 2300 with CMIP6 under the seven SSP and climate model combinations that show a considerable global mean temperature overshoot ( $>0.6^{\circ}\text{C}$ ). Mass changes are shown in % relative to 2020 in High-Mountain Asia (containing the RGI regions Central Asia, South Asia West and South Asia East), European Alps, Iceland and globally for the three different large-scale glacier models (data from ref.<sup>1</sup>). GloGEM projections were not available for IPSL-CM6A-LR SSP5-3.4-over.**

55 The three available glacier model simulations (OGGM, PyGEM-OGGM, GloGEM) show a qualitatively  
 56 similar global glacier mass response until 2300 under the selected CMIP6 scenarios with a temperature

57 overshoot (Supplementary Fig. 1), but regional responses can be substantially different between models.

58 Reasons for the differences are, among others, different representations of glacier dynamics (i.e., mass  
59 redistribution curves as done in GloGEM versus shallow-ice approximation in OGGM and PyGEM-  
60 OGGM, the former being less realistic under regrowth conditions<sup>5</sup>), or glacier mass balance models. In  
61 addition, the calibration choice of the mass balance model parameters substantially influences glacier  
62 mass and runoff estimates<sup>7</sup>.

63 Another uncertainty within the glacier models is the climate models' bias correction period. For a  
64 sensitivity test, we used another bias correction period (2000–2019), instead of 1980–2019 and repeated  
65 the OGGM glacier model projections under the GFDL-ESM2M scenarios until 2500. For the comparison,  
66 we only used those glaciers that did not fail in any of the bias correction period approaches. We found  
67 that using the bias correction period 2000–2019 results in 8% less glacier mass in 2500 for most scenarios  
68 compared to using the bias correction period 1980–2019 (default approach in our study). However, the  
69 differences between the temperature overshoot and the stabilisation scenario projections in 2500 are similar  
70 for the two bias correction periods (not shown).

71 Differences between climate models themselves substantially influence the glacier response under a  
72 global temperature overshoot. Glaciers in Greenland Periphery, Iceland and Scandinavia, for example,  
73 might be impacted by a delayed response of Atlantic Meridional Overturning Circulation feedbacks<sup>6,8</sup>.  
74 Glaciers in continental regions might be affected by the stronger cooling over land<sup>9</sup>. In contrast, glacier  
75 regions near high present-day aerosol loading might warm up more due to future aerosol reduction.  
76 Thus, local glacier states will always differ due to the non-complete reversal of the local climate after a  
77 temperature overshoot. Using several glacier models on a soon-available overshoot ensemble of climate  
78 models and a range of scenarios (e.g. from ScenarioMIP) might allow for a more detailed analysis.

79 **Additional idealised experiments**

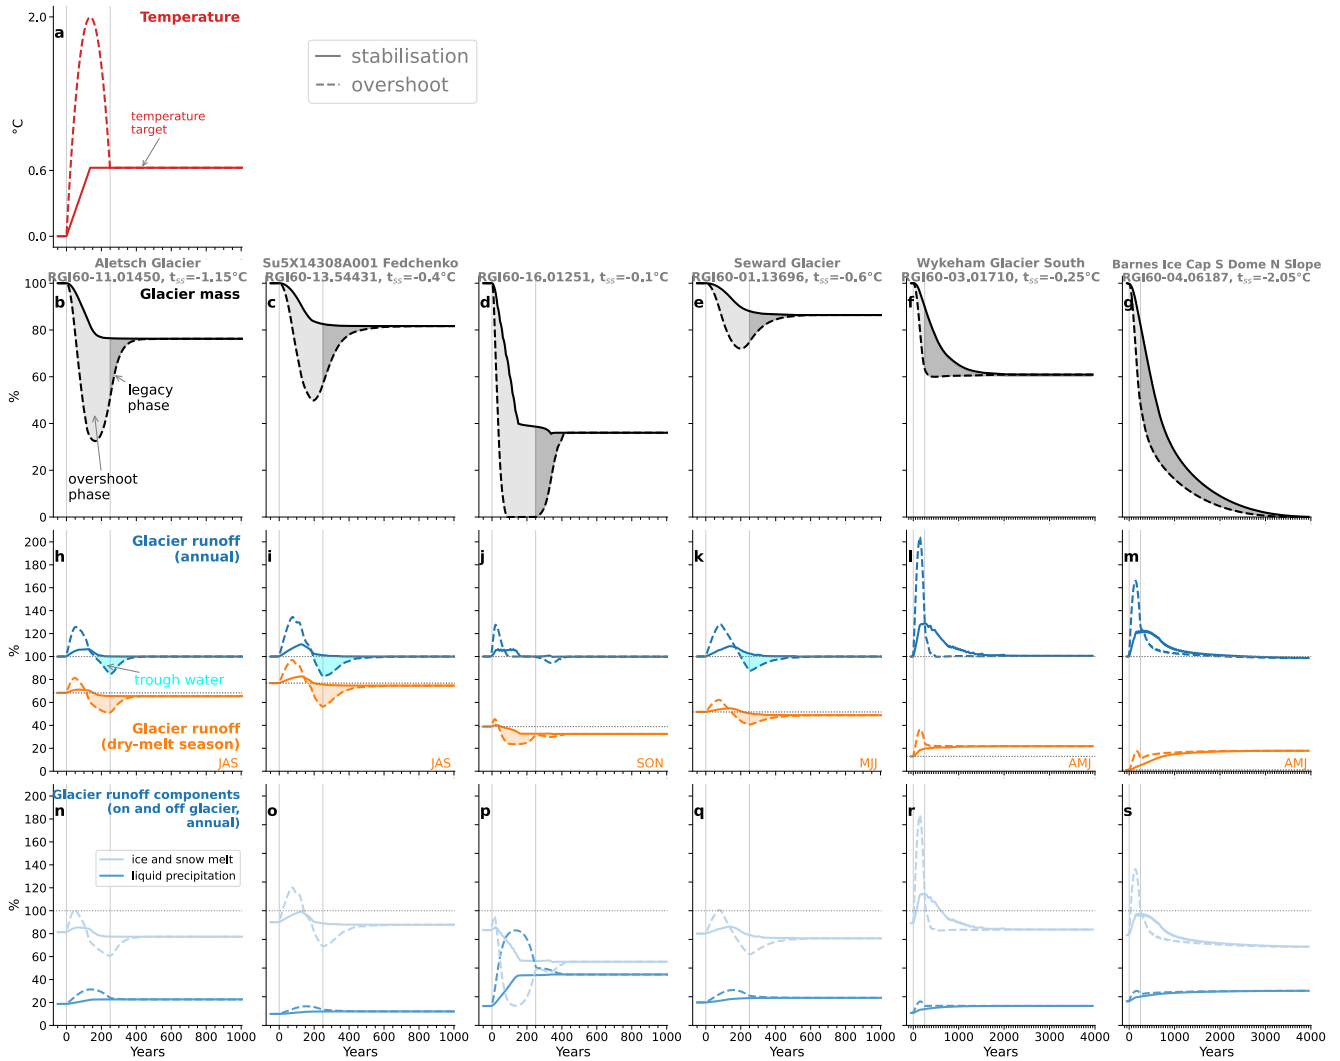

**Figure 2: Projected glacier mass and runoff change for idealised temperature stabilisation and overshoot experiments (similar to Fig. 1, but for the largest glaciers of six glacier regions). (a) Applied temperature change. (b–g) Glacier mass remaining, and (h–m) annual and seasonal glacier runoff response, both relative to the initial state. (n–s) Annual glacier runoff components from the formerly glacierised area given as the ice and snow melt and liquid precipitation. The steady-state temperature bias  $t_{ss}$  is given for every glacier. Precipitation is kept constant. Dry-melt season runoff refers to the three driest months over the melt season and is shown relative to the annual initial glacier runoff. Annual and seasonal runoff is 21-year averaged. Note that for four glaciers, we show the experiments only for 1000 years, while the very slow-responding Wykeham Glacier South and Barnes Ice Cap, are shown for 4000 years. See ‘Supplementary Methods’ for additional detail on idealised experiments.**

80 In the following, we provide further details on the idealised experiments presented in Fig. 1, and addition-  
 81 ally analyse the idealised response of other glaciers. This extended analysis helps us better understand  
 82 the regional variability of glacier mass and runoff responses to climate projections.

83 Annual runoff reaches the same level as in the previous steady state since the contributing area and  
 84 precipitation do not change. However, the runoff components and seasonality do change (Supplementary

85 Fig. 2), which is counterbalanced in the other months by increased runoff due to increased liquid precipi-  
86 tation and off-glacier snow melt. With this idealised model experiment, we could reproduce with OGGM  
87 the schematic illustration of peak water of Huss & Hock<sup>10</sup>). However, our model-based experiments also  
88 show the time-lagged response of glacier mass and annual and seasonal runoff, which is important for  
89 slow-responding glaciers. This time-lagged response is not visible in Huss & Hock<sup>10</sup>).

90 Slow-responding glaciers show a less intense and more stretched (longer) period of trough water (Sup-  
91 plementary Fig. 2). For glaciers that respond even slower than the temperature overshoot recovery (e.g.  
92 Wykeham Glacier South or Barnes Ice Cap), no regrowth occurs, and thus, no trough water occurs. Note  
93 that the melt components of, e.g., Wykeham Glacier South are very sensitive to temperature changes and  
94 liquid precipitation components from the runoff are small, which explains the doubling of the runoff. For  
95 most glaciers, the runoff response of the driest months within the melt season follows roughly the shape  
96 of the annual response. However, our idealised experiments started with glaciers being in a steady state  
97 with the climate; in reality, glaciers are not in balance and, e.g., peak water might have already occurred.

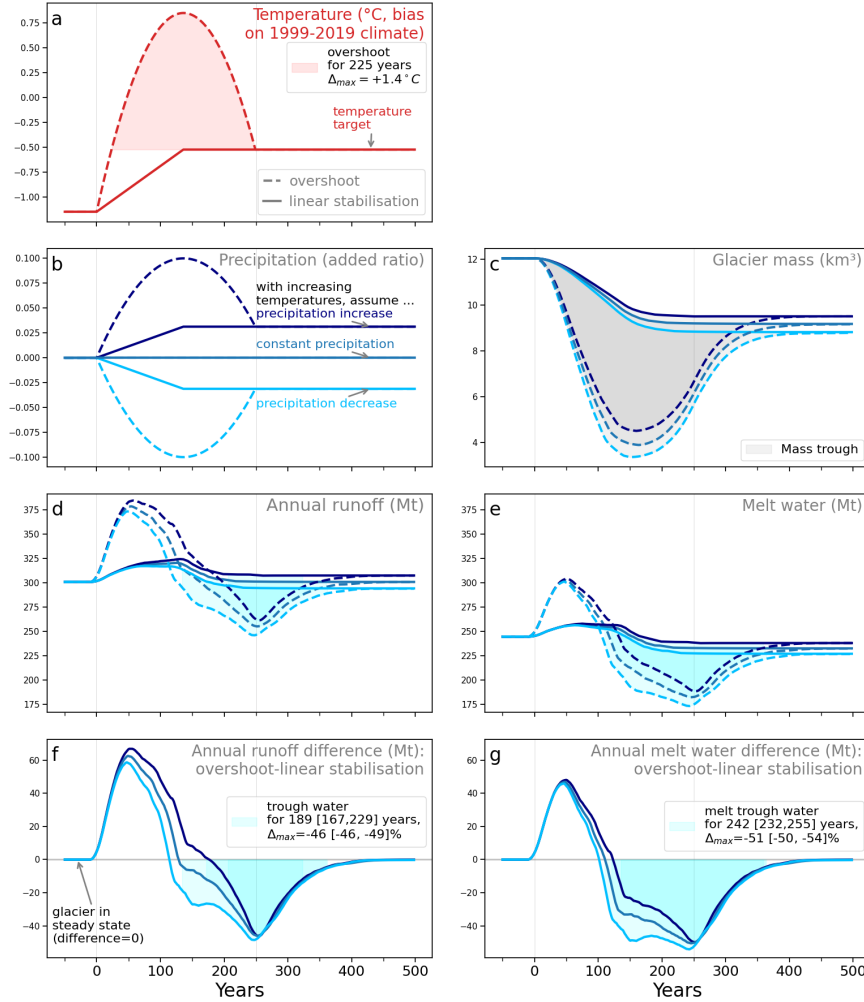

**Figure 3: Influence of precipitation changes on glacier mass and annual runoff changes under an idealised stabilisation and overshoot experiment with the fast-responding Aletsch glacier.** (a) We applied the same temperature changes as in Fig. 1 and Supplementary Fig. 2. (b) The precipitation changes were increased, kept constant or decreased linearly for a temperature increase ( $\pm 5\% \text{ }^\circ\text{C}^{-1}$ ). (c) shows the precipitation-change-dependent mass changes. The mass differences between the overshoot and the linear stabilisation experiment ("Mass trough") are highlighted. (d, f) shows the annual runoff and annual runoff differences between experiments (both 21-year averaged). Annual glacier-runoff trough water is highlighted. The number of years with trough water and the maximum runoff depletion ( $\Delta_{max}$ ) for the different precipitation change experiments are mentioned. (e, g) show only the glacier meltwater components of the glacier runoff (21-year averaged), i.e., excluding the liquid precipitation components within and outside the glacier area.

98 We analyse idealised precipitation changes experiments to better understand the influence of pre-  
 99 cipitation changes on glacier mass and runoff projections. In general, with increasing temperatures,  
 100 precipitation often increases but can regionally also decrease. If precipitation increases with temperature,  
 101 glacier mass loss is reduced, the peak water is slightly more intense and delayed, and the trough water  
 102 in the overshoot experiment is also less intense and shorter (Supplementary Fig. 3). If precipitation  
 103 decreases while the temperature increases, the peak water occurs earlier and is less intense; conversely,  
 104 trough water starts earlier, is slightly more intense, and lasts longer.

105 **Glacier mass projections under GFDL-ESM2M extended scenarios**

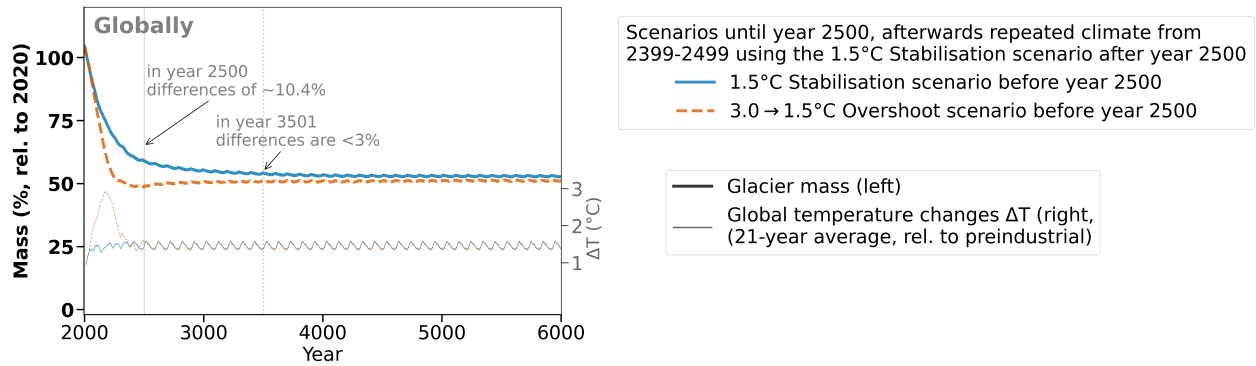

**Figure 4: Global glacier mass projections from the year 2000 until 6000 (% relative to 2020) under an extended 1.5°C Stabilisation and 3.0→1.5°C Overshoot scenario.** Until 2500 the same scenarios as in Fig. 2a were applied. After 2500, an identical climate (randomly repeated climate taken from the last 100 years of the 1.5°C Stabilisation scenario) was used. The resulting global mean temperature changes of the extended scenarios are shown. For visual reasons, we only show the simulations until year 6000 as no significant changes occur afterwards, i.e. the global glacier mass reached steady state in both scenarios.

106 The scenarios until 2500 reveal large parts but not the complete committed glacier mass losses due to the  
 107 slow response of some flat, large glacier regions. Our extended stabilisation and overshoot projections show  
 108 that glaciers continue losing mass beyond 2500 before finally reaching a new steady state (Supplementary  
 109 Fig. 4). While global glacier loss converges to similar steady states in the millennia following the applied  
 110 overshoot, it remains globally irreversible relative to the stabilisation scenario for centuries post-overshoot.

111 Note that there are more failing glaciers for the over 10,000 year-long projections, which explains why  
 112 the differences between the 1.5°C Stabilisation and the 3.0→1.5°C Overshoot are 10.4% in the year 2500  
 113 under the non-failing glaciers of the extended projection, while they are 11.3% when accounting for all  
 114 non-failing glaciers until 2500 (as shown in Fig. 2b). In addition, some marine-terminating glaciers in  
 115 the Subantarctic & Antarctic Islands do not fully converge to a similar steady state in the two extended  
 116 scenarios even after 10,000 years of equal climate (not shown). The reasons are unclear, and the potential  
 117 glacier model’s dependence on that has to be analysed. Furthermore, we assumed that for our extended  
 118 stabilisation and overshoot scenarios, the local climate after the overshoot would be the same as for the  
 119 stabilisation scenario. However, global climate reversal does not imply local climate reversal, even over  
 120 extended periods<sup>6</sup>.

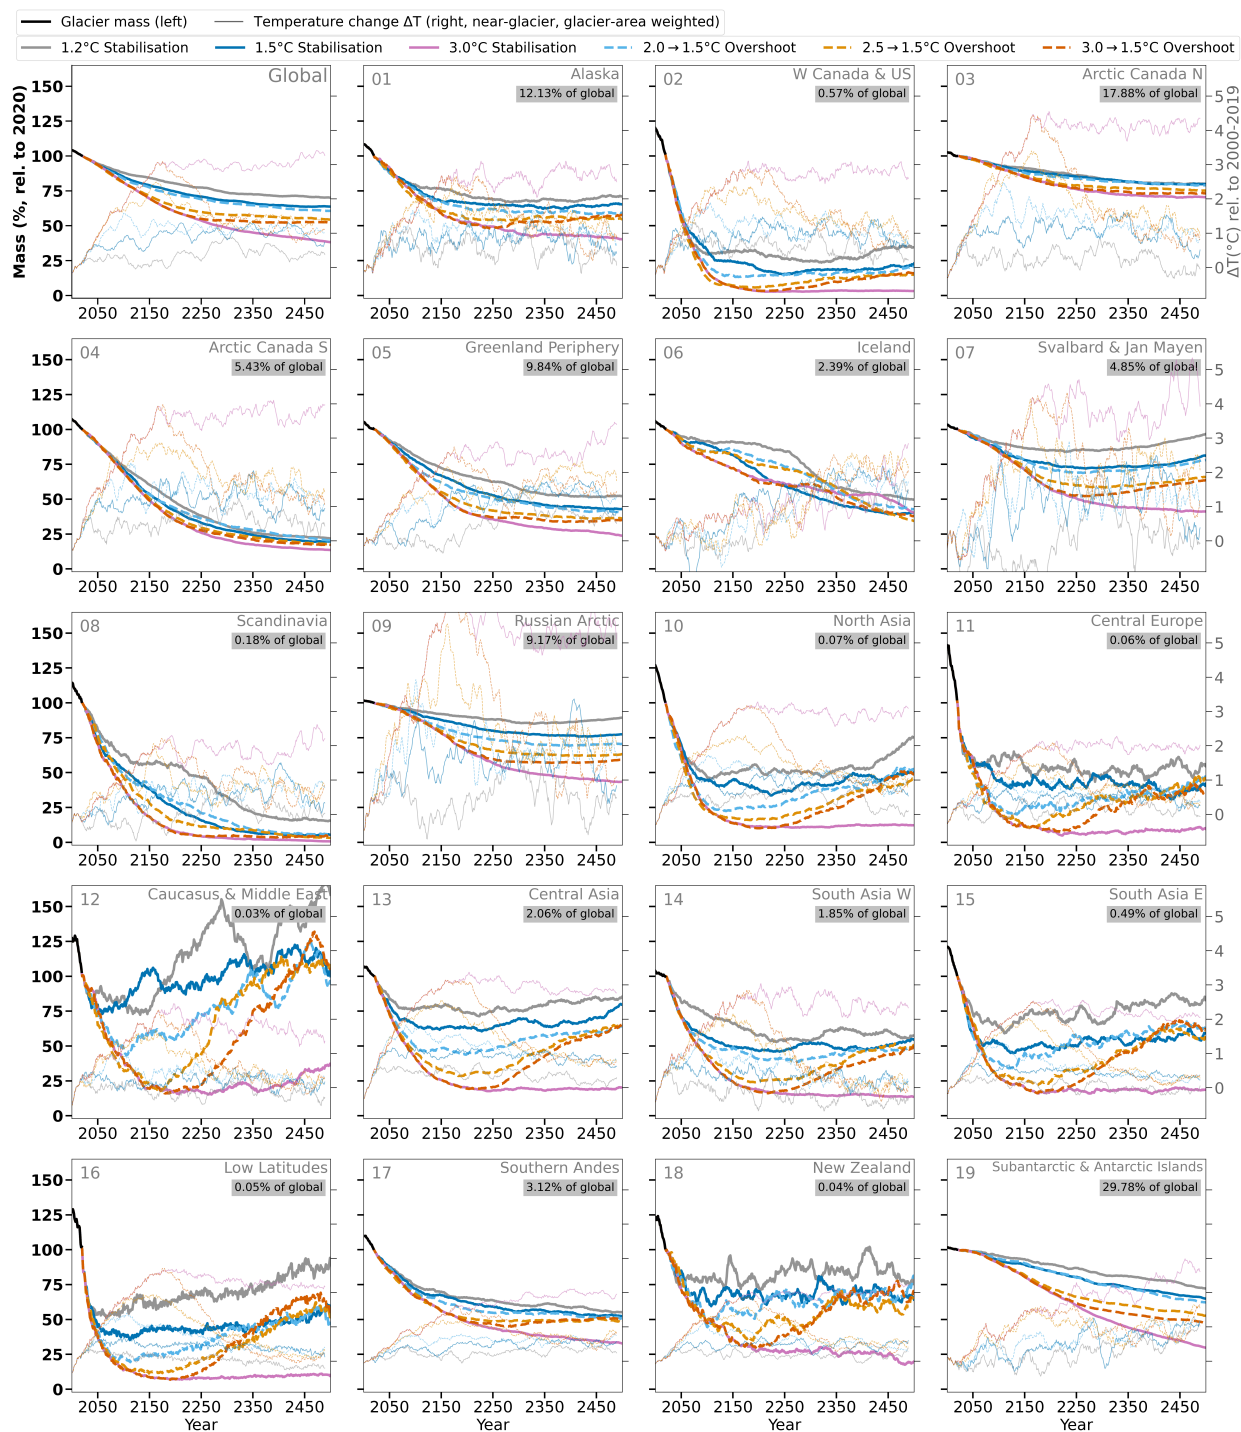

**Figure 5: Glacier mass remaining under stabilisation and overshoot scenarios together with regional near-glacier temperature changes (21-year averaged) for every RGI region.** Glacier mass in 2020 relative to global estimates is given globally and for every region. Past changes from 2000 to 2019 are shown in black. Glacier regions’ locations, their clusters and other characteristics are given in Fig. 3.

122 Compared to Fig. 3, we show in Supplementary Fig. 5 the individual RGI region glacier mass response  
123 and, in addition, weaker overshoots to demonstrate the magnitude's sensitivity. Glaciers globally are  
124 projected to lose 30 to 62% of their mass by 2500, relative to 2020, for the 1.2 to 3.0°C Stabilisation  
125 scenarios. The overshoots peaking at 2.0°C or 2.5°C in 2500 result in 3% or 9% more global glacier mass  
126 loss compared to the stabilisation scenario while the overshoot peaking at 3.0°C results in 11% more mass  
127 loss in 2500.

128 The cooling after peak warming and the glaciers' response times are highly heterogeneous and thus  
129 the impacts are region-specific. Within the fast-responding regions, glacier regions regrow at a different  
130 pace; e.g. Central Europe regrows completely to the 1.5°C Stabilisation scenario mass level until 2500,  
131 while for Central Asia, the glacier mass is still 14% smaller until 2500 for the 3.0→1.5°C Overshoot  
132 compared to the 1.5°C Stabilisation scenario.

133 The regional glacier mass response to a global temperature overshoot is similar to our idealised exper-  
134 iments with glaciers of different glacier geometries (Supplementary Fig. 2). However, unlike the idealised  
135 experiments, the projections start with glaciers that are not in a steady state with the current climate. In  
136 some regions (mainly Arctic Canada North and South), small projection differences occur despite large  
137 regional temperature differences because the committed mass loss at 1.2°C dominates the response until  
138 2500 (Supplementary Fig. 5). Specifically, Arctic Canada South has many slow-responding ice caps (such  
139 as the Barnes Ice Cap<sup>11</sup>). For Scandinavia, W Canada & US, and Arctic Canada South less than 25%  
140 glacier mass is projected to remain until 2500 under the 1.5°C Stabilisation scenario (Fig. 3f) scenario,  
141 which limits potential differences for the warmer 3.0→1.5°C Overshoot scenario. In addition, regional  
142 climate changes are different to the global response. For example, in Iceland, the projections differ little  
143 because the regional temperature change is similar between the scenarios in the GFDL-ESM2M. Also note  
144 that interdecadal near-glacier projected precipitation variability (Supplementary Figs. 6-8) might explain  
145 some of the projected interdecadal glacier mass changes.

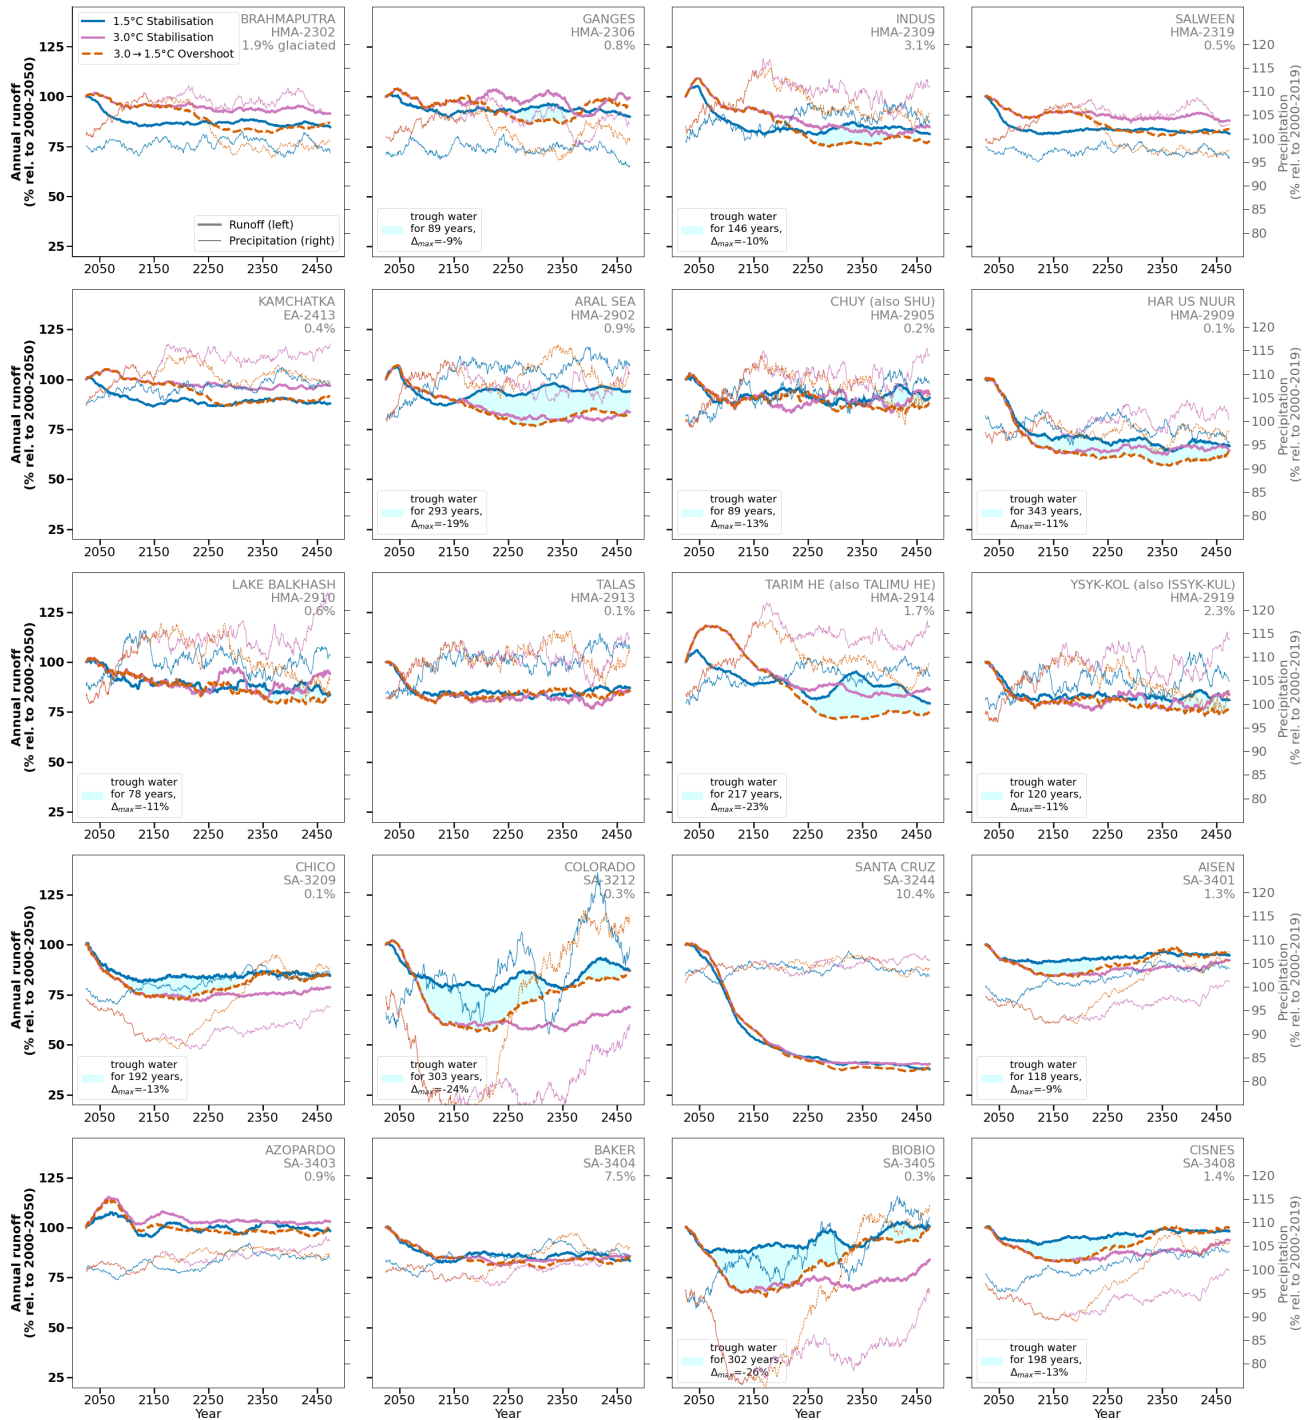

Figure 6: Annual glacier runoff projections (relative to 2000–2050) and respective near-glacier precipitation (relative to 2000–2019, both 51-year averaged). We show the first 20 glaciated basins, sorted by basin index. The basins shown are located in High-Mountain Asia (HMA) and the Southern Andes (SA); with the basin name, region, and Global Runoff Data Centre (GRDC) index provided. For each basin, the glaciation extent around year 2000, the number of years with estimated trough water and the maximum difference ( $\Delta_{max}$ ) are indicated. Only three scenarios are presented to enhance comparison.

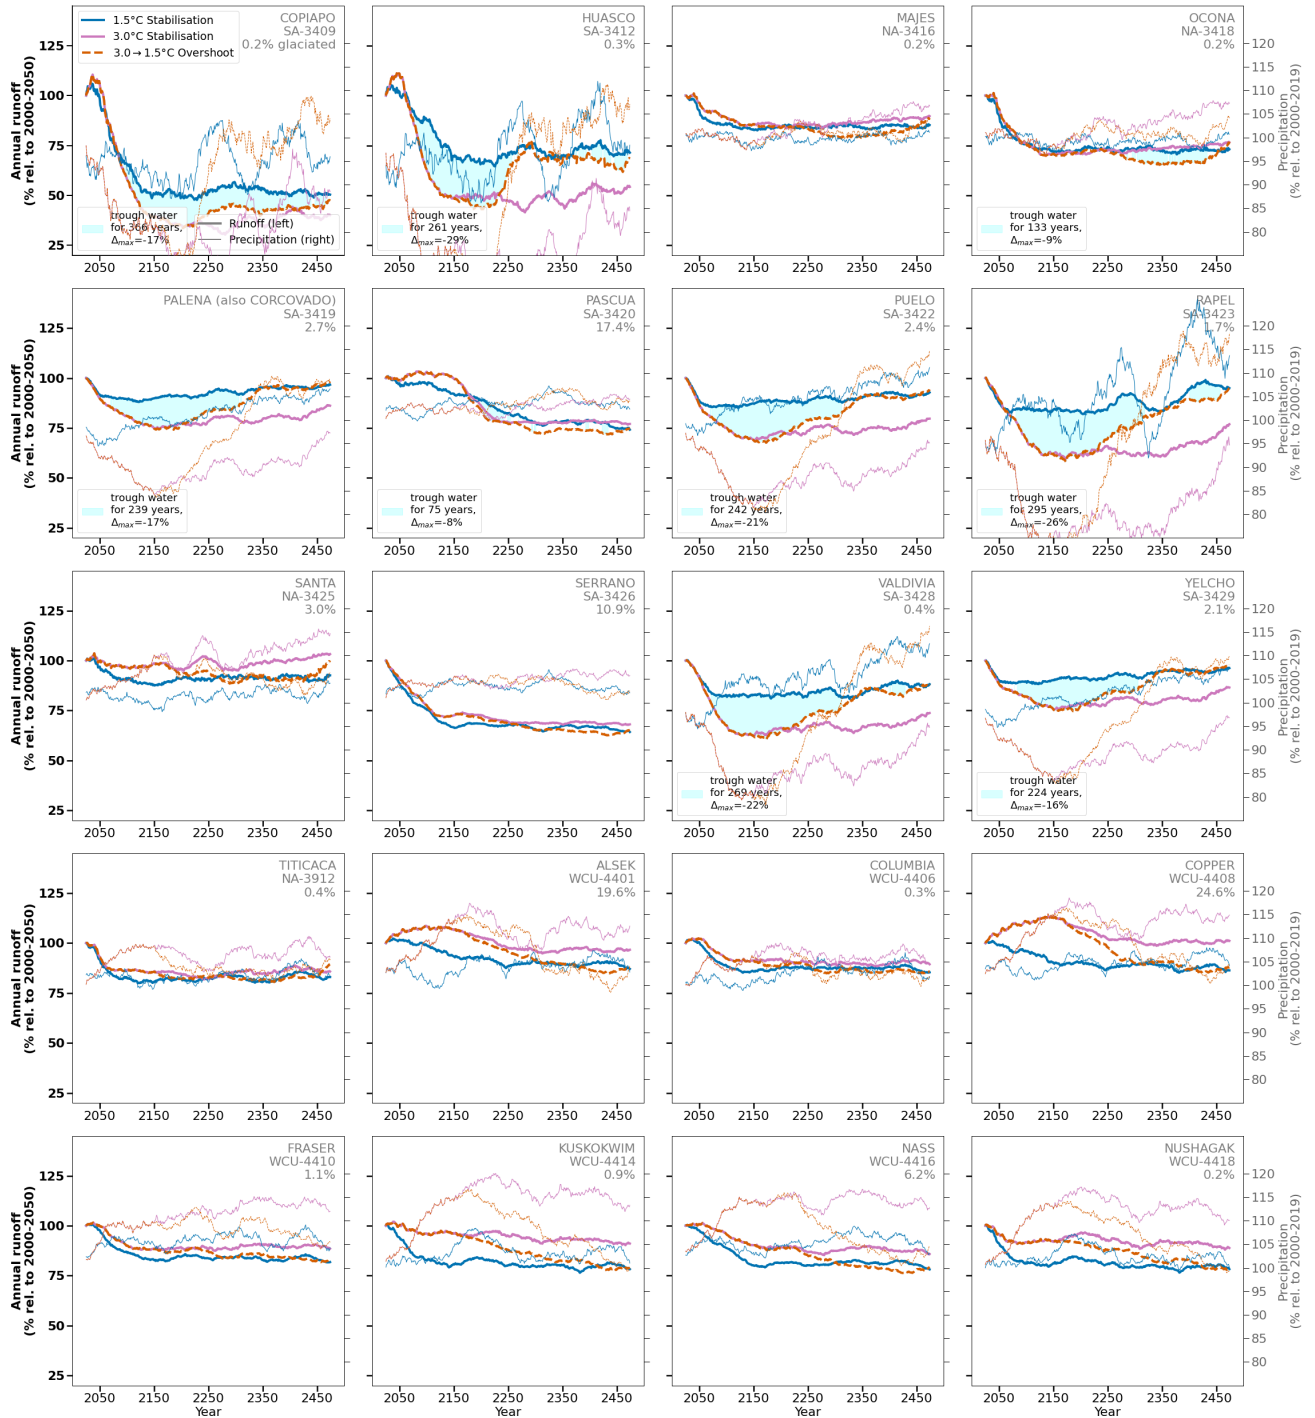

**Figure 7: Annual glacier runoff projections (relative to 2000–2050) and respective near-glacier precipitation (relative to 2000–2019, both 51-year averaged).** We show the next 20 glaciated basins following those presented in Fig. 6, sorted by basin index. The basins shown are located in the Southern Andes (SA), Northern Andes (NA), and Western Canada & USA (WCU); with the basin name, region, and Global Runoff Data Centre (GRDC) index provided. For each basin, the glaciation extent around year 2000, the number of years with estimated trough water and the maximum difference ( $\Delta_{max}$ ) are indicated. Only three scenarios are presented to enhance comparison.

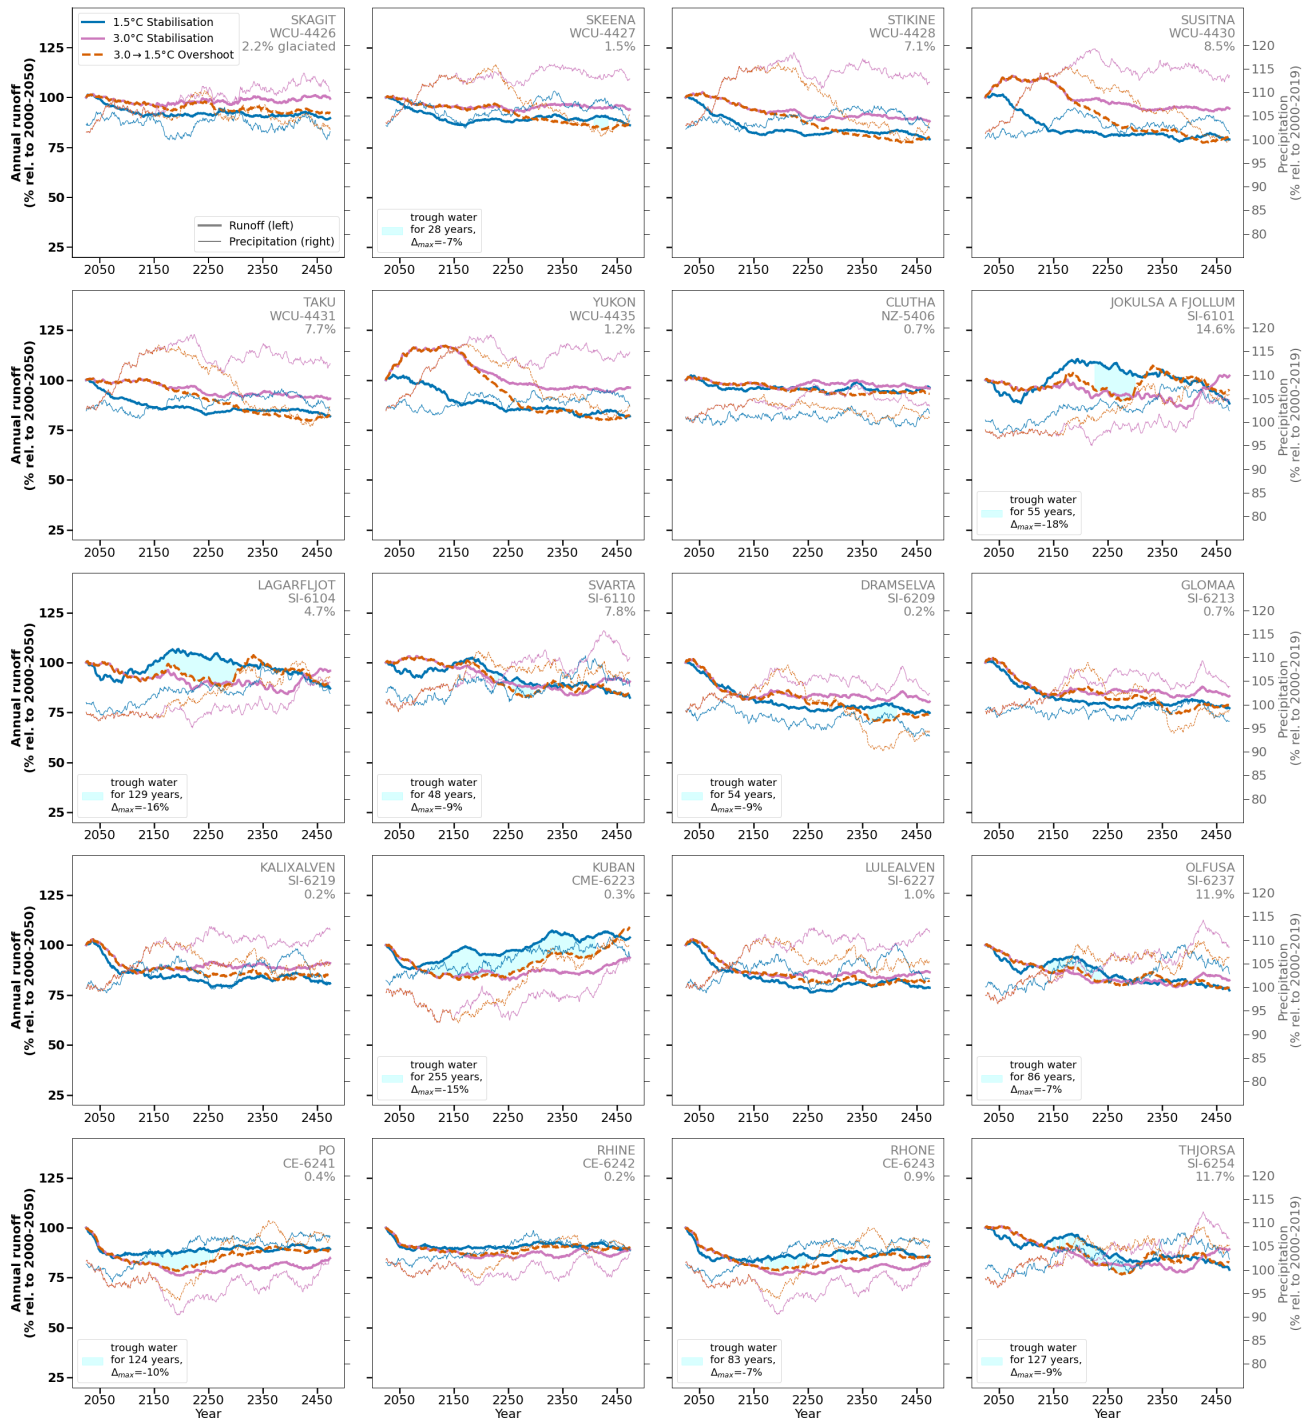

**Figure 8: Annual glacier runoff projections (relative to 2000–2050) and respective near-glacier precipitation (relative to 2000–2019, both 51-year averaged).** We show the last 20 glaciated basins following those presented in Fig. 7, sorted by basin index. The basins shown are located in Western Canada & USA (WCU), New Zealand (NZ), Scandinavia and Iceland (SI), Caucasus and Middle East (CME) and Central Europe (CE); with the basin name, region, and Global Runoff Data Centre (GRDC) index provided. For each basin, the glaciation extent around year 2000, the number of years with estimated trough water and the maximum difference ( $\Delta_{max}$ ) are indicated. Only three scenarios are presented to enhance comparison.

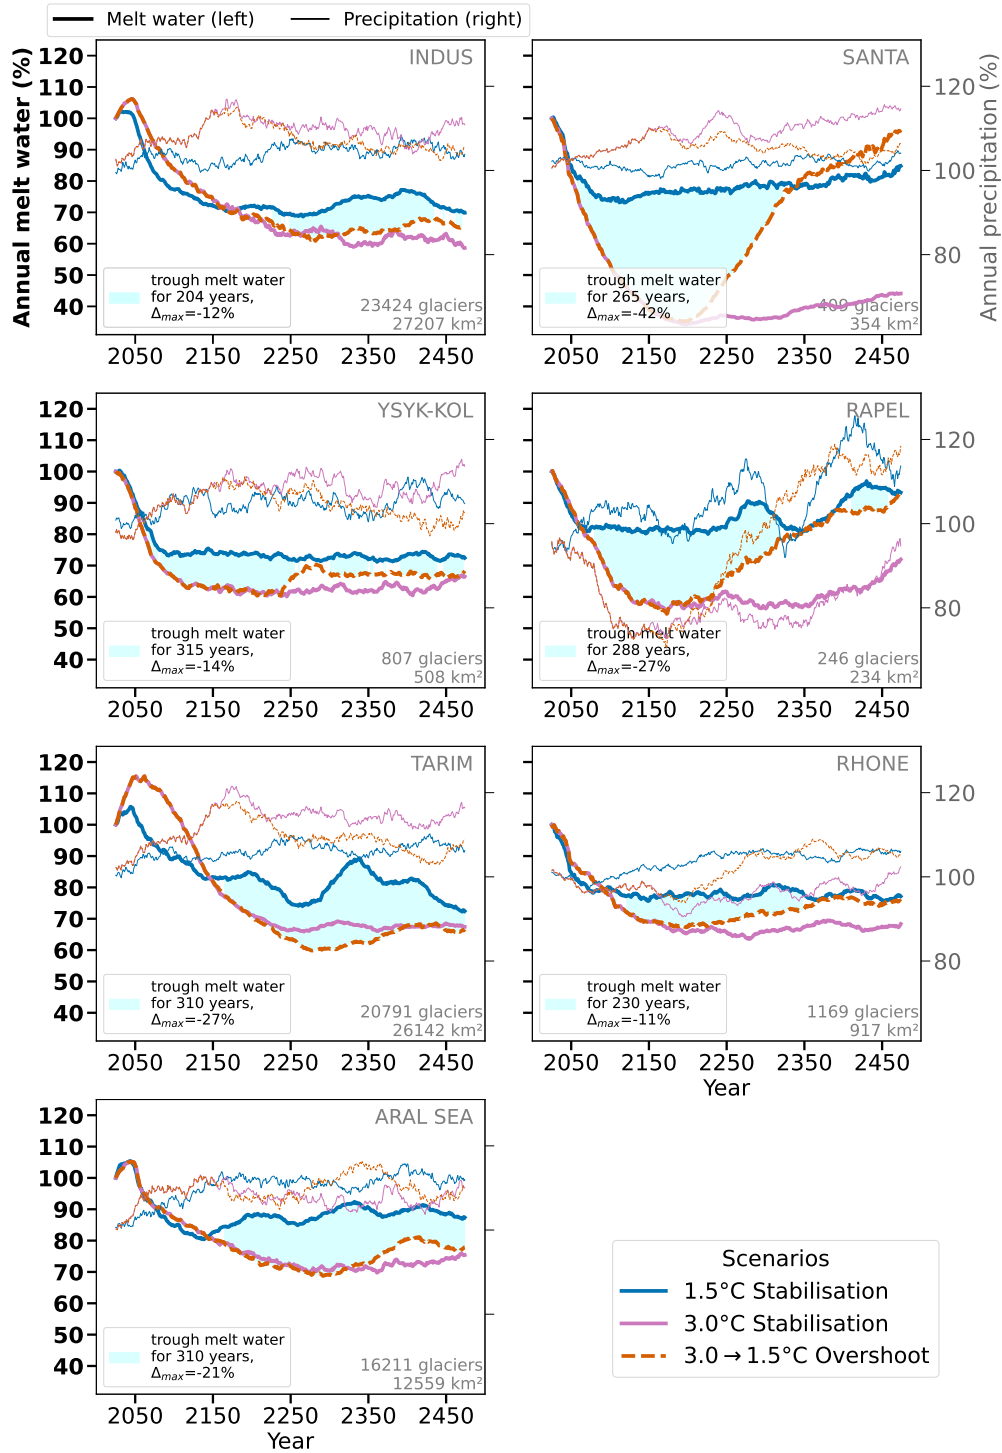

Figure 9: Meltwater components of the annual glacier runoff projections (relative to 2000–2050) and respective near-glacier precipitation (relative to 2000–2019, both 51-year averaged) for the seven most arid and strongly glaciated basins. Similar to Fig. 4b but showing only the ice and snow melt on and off the glacierised area, thus discarding the liquid precipitation runoff components. The "trough melt water" was defined equivalent to the "trough water" with only the meltwater components. We give the number of glaciers together with the glaciated area, and the number of years with estimated trough water with the maximum difference ( $\Delta_{max}$ ). Only three scenarios are presented to enhance comparison. The map shows the outlines of the seven selected basins. All basins have an aridity index  $<2$  (according to ref. <sup>12</sup>) and are initially above 0.9% glaciated.

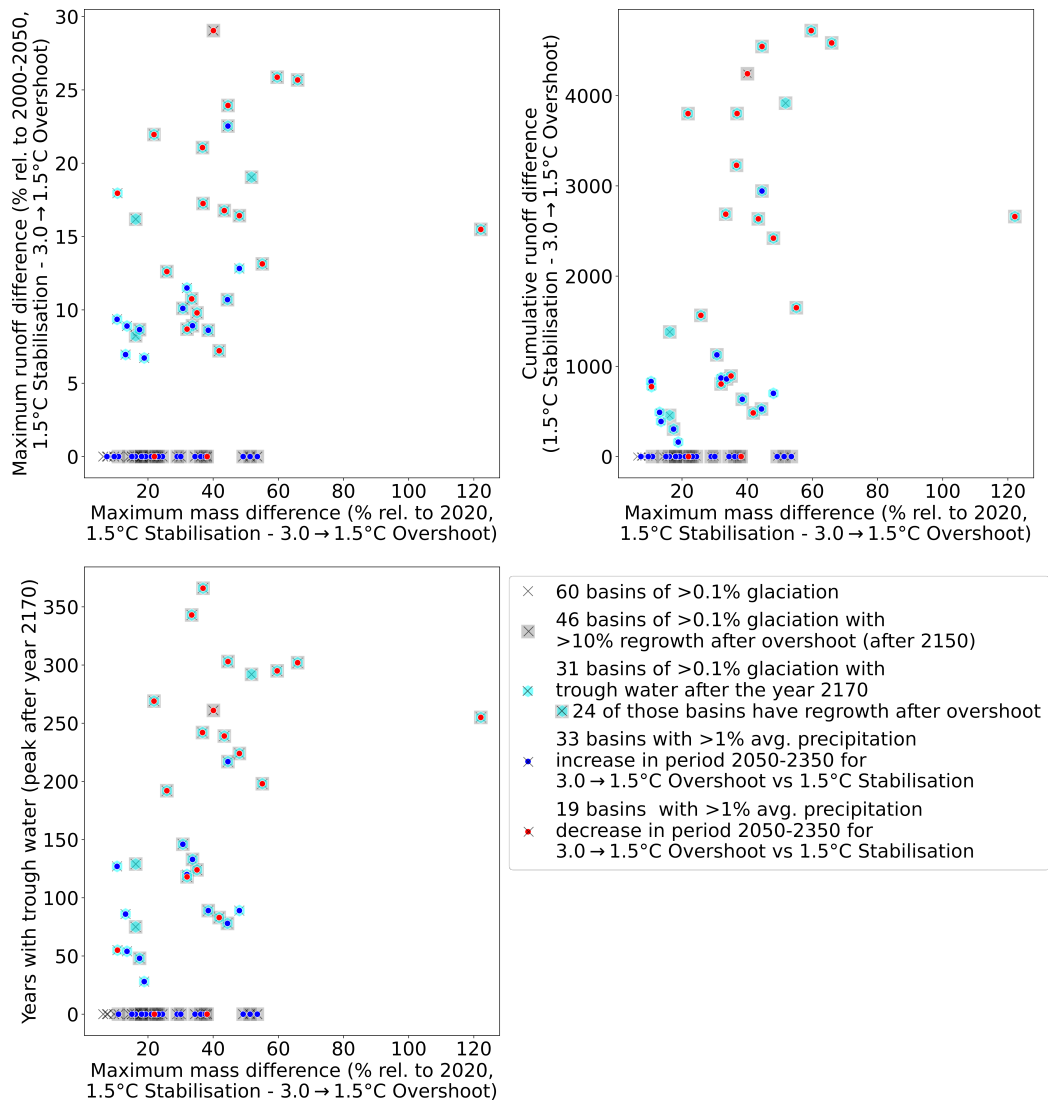

**Figure 10: Basin statistics of annual glacier runoff differences between the 1.5°C Stabilisation and the 3.0→1.5°C Overshoot scenario for 60 glaciated basins.** The individual projections of these 60 basins are shown in Figs. 6-8. Basins where glacier mass regrows by at least 10% after year 2150 are highlighted together with those with a trough water that peaks after year 2170. We also show for each basin whether average precipitation increases or decreases in the 2050-2350 period under the overshoot scenario.

147 Annually averaged glacier runoff changes (Supplementary Figs. 6-8) are often not a very good charac-  
 148 teristic of hydrological impacts of glacier changes<sup>12</sup>, but still give an overview of the long-term patterns.  
 149 46 glaciated basins regrow by more than 10% after the temperature overshoot (after 2150), and 24 of  
 150 those basins also create trough water after 2170 (Supplementary Fig. 10). For the 19 glaciated basins  
 151 with regional precipitation decrease during a regional temperature overshoot (e.g. Rapel basin, GRDC  
 152 index of 3423, in Southern Andes), the trough water is larger than on those 33 basins with an apparent  
 153 regional precipitation increase (e.g. Salween basin, 2319, in High Mountain Asia). For basins where  
 154 precipitation increases with warming, total annual glacier runoff can increase and stabilise at higher levels

155 in the longer term under warmer scenarios (e.g. Brahmaputra basin, 2302, in High Mountain Asia; Santa  
 156 basin, 3425, in the Northern Andes; and Taku basin, 4431, in Western Canada & USA) due to increased  
 157 amounts of liquid precipitation (Supplementary Figs. 6-8). For basins where precipitation decreases with  
 158 warming (e.g. Cisnes basin, 3408, or Rapel basin, 3423, both in Southern Andes; and Rhone basin, 6243,  
 159 in Central Europe), decreasing annual runoff and trough water may be intensified after the 21<sup>st</sup> century  
 160 (Supplementary Figs. 6-8, 10).

161 When only considering the annual meltwater components of the glacier runoff (snow and ice melt on  
 162 and off the glacier area), the direct effects of increased liquid precipitation from the scenario-dependent  
 163 precipitation changes get removed (Supplementary Fig. 9). For all seven selected basins, the trough  
 164 meltwater is more intense than the trough water from the annual glacier runoff (Supplementary Figs. 6-  
 165 9). The effect of temperature-dependent precipitation changes on annual glacier runoff was similarly  
 166 found in the idealised experiments (Supplementary Fig. 3).

167 Although we show here the glacier runoff response to a global temperature overshoot for every basin,  
 168 we want to emphasise again that these projections only stem from a single glacier model and a single  
 169 Earth System Model. Additional model simulations are necessary for more robust quantitative estimates.

170 **Additional analysis on local or regional climate of W5E5 or GFDL-ESM2M**

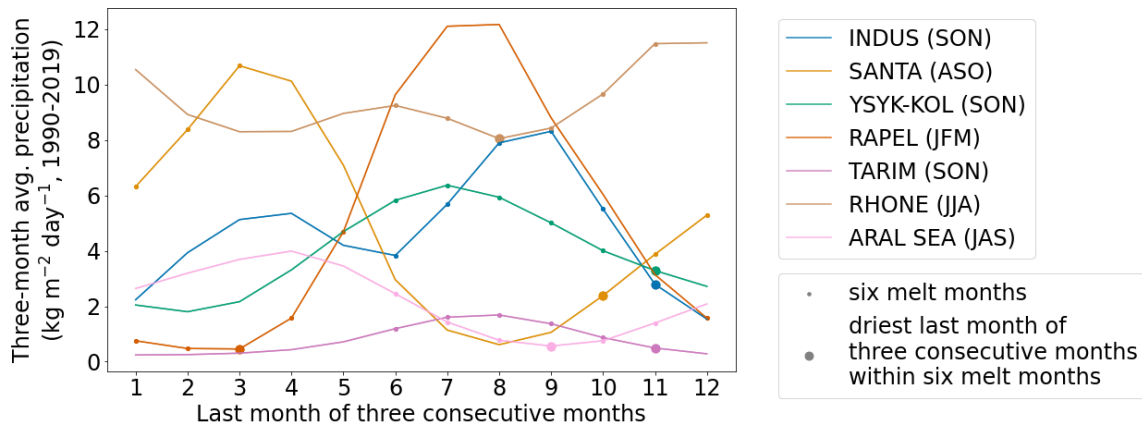

**Figure 11: Three-month averaged precipitation cycle and melt season of the seven most arid and strongly glaciated basins (1990–2019).** The precipitation estimates were taken from the reanalysis climate dataset W5E5. The driest three-month period (given as the last month of three consecutive months) within the melt season (six months with the largest melt) is highlighted (see methods). The initial letters of the driest melt period months are also given in the legend.

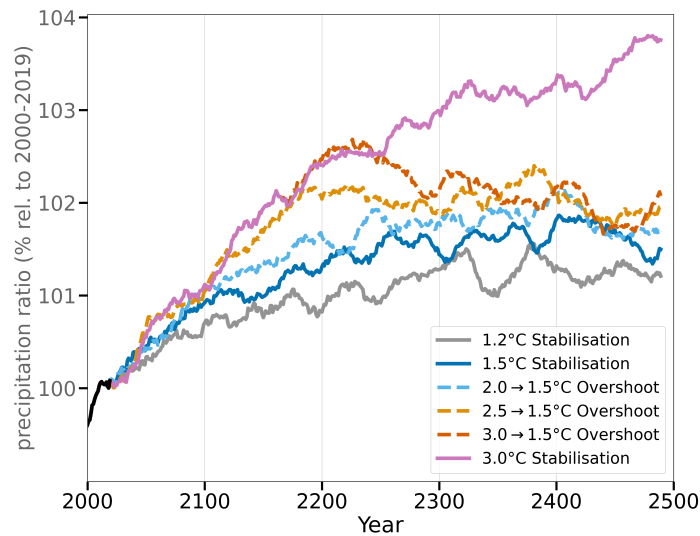

**Figure 12: Global projected precipitation changes (21-year centered rolling average) for the used stabilisation and overshoot scenarios of the GFDL-ESM2M.** Past changes from 2000 to 2019 are shown in black. The global temperature changes are in Fig. 2a.

## References

- [1] Schuster, L., Huss, M., Maussion, F., Rounce, D. R., & Tober, B. S. *lilianschuster/glacier-model-projections-until2300: v1.0 (v1.0) [Data set]*. Zenodo, 2023. doi: <https://doi.org/10.5281/zenodo.10059778>.
- [2] Maussion, F., Butenko, A., Champollion, N., Dusch, M., Eis, J., Fourteau, K., Gregor, P., Jarosch, A. H., Landmann, J., Oesterle, F., Recinos, B., Rothenpieler, T., Vlug, A., Wild, C. T., & Marzeion, B. *The Open Global Glacier Model (OGGM) v1.1*. *Geoscientific Model Development*, 12(3), 909–931, 2019. doi: <https://doi.org/10.5194/gmd-12-909-2019>.
- [3] Rounce, D. R., Hock, R., Maussion, F., Hugonnet, R., Kochtitzky, W., Huss, M., Berthier, E., Brinkerhoff, D., Compagno, L., Copland, L., Farinotti, D., Menounos, B., & McNabb, R. W. *Global glacier change in the 21st century: Every increase in temperature matters*. *Science*, 379(6627), 78–83, 2023. doi: <https://doi.org/10.1126/science.abo1324>.
- [4] Zekollari, H., Huss, M., Schuster, L., Maussion, F., Rounce, D. R., Aguayo, R., Champollion, N., Compagno, L., Hugonnet, R., Marzeion, B., Mojtabavi, S., & Farinotti, D. *21<sup>st</sup> century global glacier evolution under CMIP6 scenarios and the role of glacier-specific observations*, 2024. Preprint at <https://egusphere.copernicus.org/preprints/2024/egusphere-2024-1013>.

- 187 [5] Huss, M., & Hock, R. *A new model for global glacier change and sea-level rise*. *Frontiers in Earth*  
188 *Science*, 3, 54, 2015. doi: <https://doi.org/10.3389/feart.2015.00054>.
- 189 [6] Lacroix, F., Burger, F. A., Silvy, Y., Schleussner, C.-F., & Frölicher, T. L. *Persistent High-Latitude*  
190 *Ocean Warming and Global Sea Level Rise Following Temporary Overshoots (2024)*. Preprint at  
191 <https://doi.org/10.22541/essoar.171588258.80079180/v1>.
- 192 [7] Schuster, L., Rounce, D. R., & Maussion, F. *Glacier projections sensitivity to temperature-index*  
193 *model choices and calibration strategies*. *Annals of Glaciology*, 2023. doi: [https://doi.org/10.1017/](https://doi.org/10.1017/aog.2023.57)  
194 [aog.2023.57](https://doi.org/10.1017/aog.2023.57).
- 195 [8] Schleussner, C.-F., Levermann, A., & Meinshausen, M. *Probabilistic projections of the Atlantic over-*  
196 *turning*. *Climatic Change*, 127(3–4), 579–586, 2014. doi: <https://doi.org/10.1007/s10584-014-1265-2>.
- 197 [9] Herger, N., Sanderson, B. M., & Knutti, R. *Improved pattern scaling approaches for the use in climate*  
198 *impact studies*. *Geophysical Research Letters*, 42(9), 3486–3494, 2015. doi: [https://doi.org/10.1002/](https://doi.org/10.1002/2015GL063569)  
199 [2015GL063569](https://doi.org/10.1002/2015GL063569).
- 200 [10] Huss, M., & Hock, R. *Global-scale hydrological response to future glacier mass loss*. *Nature Climate*  
201 *Change*, 8(2), 135–140, 2018. doi: <https://doi.org/10.1038/s41558-017-0049-x>.
- 202 [11] Gilbert, A., Flowers, G. E., Miller, G. H., Rabus, B. T., Van Wychen, W., Gardner, A. S., &  
203 Copland, L. *Sensitivity of Barnes Ice Cap, Baffin Island, Canada, to climate state and internal*  
204 *dynamics*. *Journal of Geophysical Research: Earth Surface*, 121(8), 1516–1539, 2016. doi: <https://doi.org/10.1002/2016JF003839>.
- 205  
206 [12] Ultee, L., Coats, S., & Mackay, J. *Glacial runoff buffers droughts through the 21st century*. *Earth*  
207 *System Dynamics*, 13(2), 935–959, 2022. doi: <https://doi.org/10.5194/esd-13-935-2022>.
